# Supplementary material
Source: Springer Nature journal article supplement (https://www.springermedizin.de/resource/supplementary/12885_2008_1367_MOESM3_ESM.pdf/9472594)

# Survival

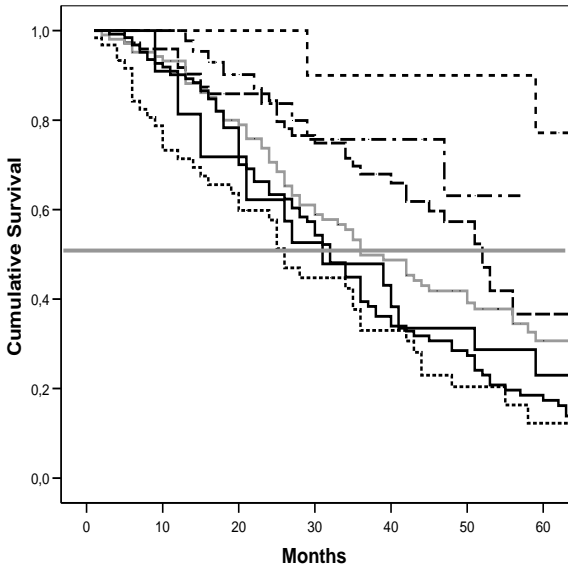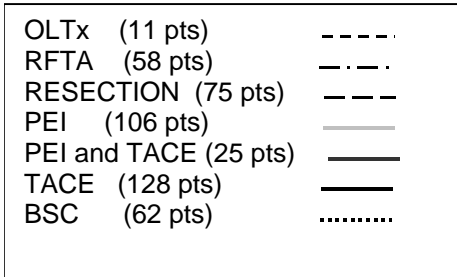

$p = 0.0001$   
 $\text{Chi}^2 = 24.973$

Supplement: MOESM3 [file 9472594]
